# Supplementary material for: 3D porous α-Ni(OH)2nanostructure interconnected with carbon black as a high-performance gas sensing material for NO2at room temperature
Source: Royal Society of Chemistry journal article supplement (doi:10.1039/c5ra17575e), 2015-01-01
Supplement: c5ra17575e1.pdf [file c5ra17575e1.pdf]

### 3D porous $\alpha$ -Ni(OH)<sub>2</sub> nanostructure interconnected with carbon black as high-performance gas sensing material for NO<sub>2</sub> at room temperature

Zhenyu Chu<sup>a</sup>, Hongxin Sun<sup>a</sup>, He Xu<sup>a</sup>, Jiao Zhou<sup>a</sup>, Guo Zhang<sup>a</sup>, Yu Xie<sup>c</sup>, Li Li<sup>\*a, b</sup>, Keying Shi<sup>\*a</sup>

<sup>a</sup> Key Laboratory of Functional Inorganic Material Chemistry, Ministry of Education; Key Laboratory of Physical Chemistry, School of Chemistry and Materials Science, Heilongjiang University, Harbin 150080, P. R. China.

<sup>b</sup> Key Laboratory of Chemical Engineering Process & Technology for High-efficiency Conversion, School of Chemistry and Materials Science, Heilongjiang University, Harbin 150080, P. R. China.

<sup>c</sup> Department of Materials Chemistry, Nanchang Hangkong University, Nanchang 330063, P.R. China

**Corresponding Author** Fax: +86 451 8667 3647; Tel: +86 451 8660 9141

E-mail: [llwjhlju@sina.cn](mailto:llwjhlju@sina.cn), [shikeying2008@163.com](mailto:shikeying2008@163.com)

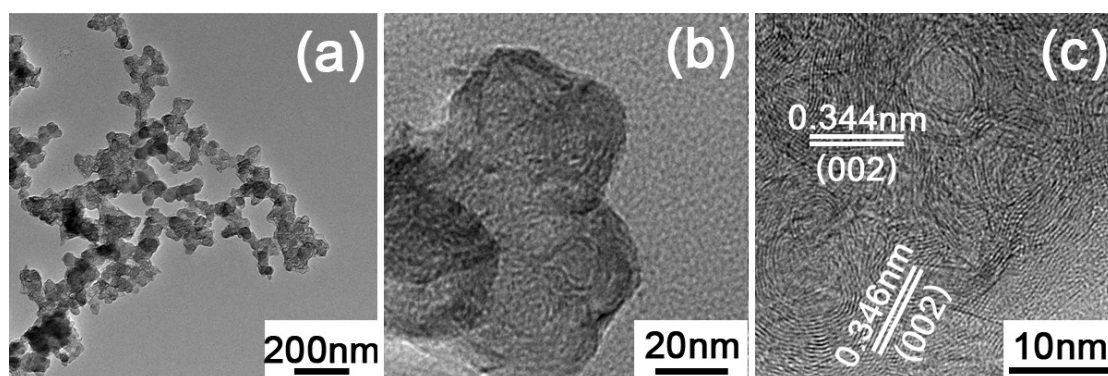

**Fig. S1** TEM/HRTEM images of Carbon black.

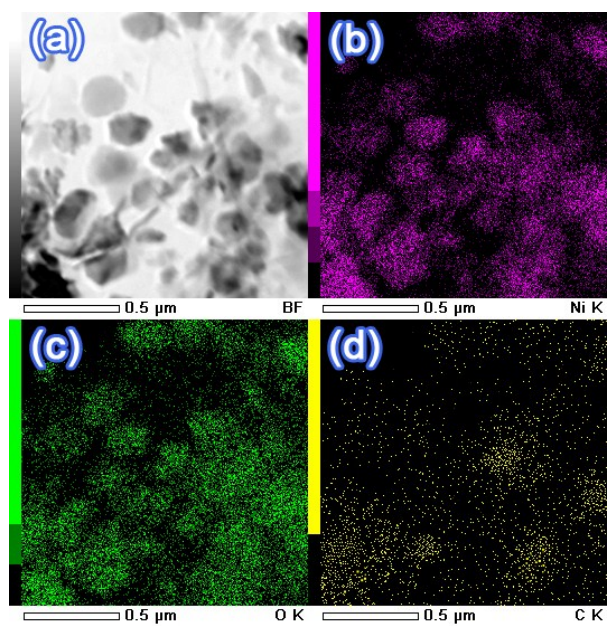

**Fig.S2.** STEM image/EDX mapping of the NiCB20: (a) Bright field image; (b), (c) and (d) corresponding to the Ni, O and C elemental mapping, respectively.

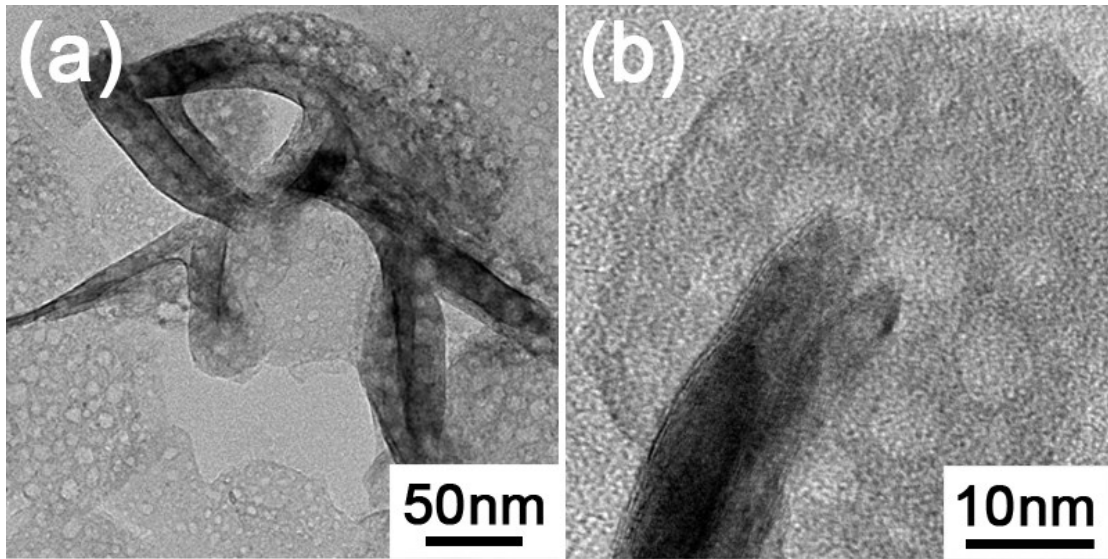

**Fig. S3** TEM images of porous  $\alpha$ -Ni(OH)<sub>2</sub> nanosheets.

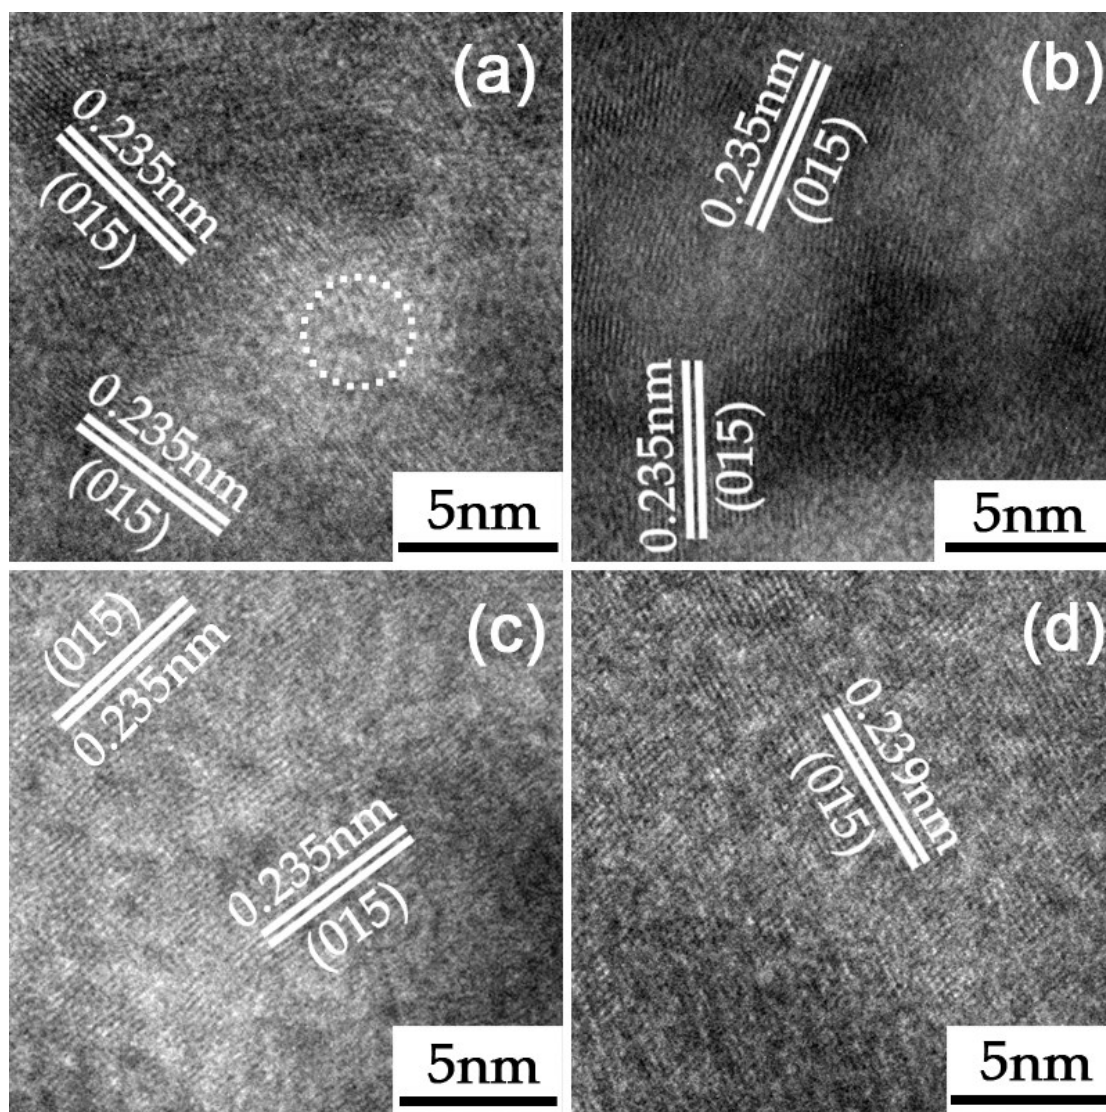

**Fig. S4** HRTEM images of  $\alpha$ -Ni(OH)<sub>2</sub> nanosheet of Fig. S2(b).

Table S1 The data of FT-IR spectrum for the samples

|                                   |      |                       |                                                               |                                                   |                       |                               |                              |                                                      |       |      |
|-----------------------------------|------|-----------------------|---------------------------------------------------------------|---------------------------------------------------|-----------------------|-------------------------------|------------------------------|------------------------------------------------------|-------|------|
| Wavenumber<br>(cm <sup>-1</sup> ) | 3644 | 3498                  | 2957,<br>2927,<br>2855,                                       | 2239                                              | 1602                  | 1480<br>1487                  | 1378                         | 1130,<br>1037,<br>1009                               | 640   | 481  |
| Functional<br>group               | -OH  | OH---H <sub>2</sub> O | -CH <sub>3</sub> ,<br>-CH <sub>2</sub><br>(DBS <sup>-</sup> ) | C≡N<br>(OCN <sup>-</sup> or<br>CNO <sup>-</sup> ) | C=C<br>(benz-<br>ene) | CO <sub>3</sub> <sup>2-</sup> | NO <sub>3</sub> <sup>-</sup> | SO <sub>4</sub> <sup>2-</sup><br>(DBS <sup>-</sup> ) | Ni-OH | Ni-O |

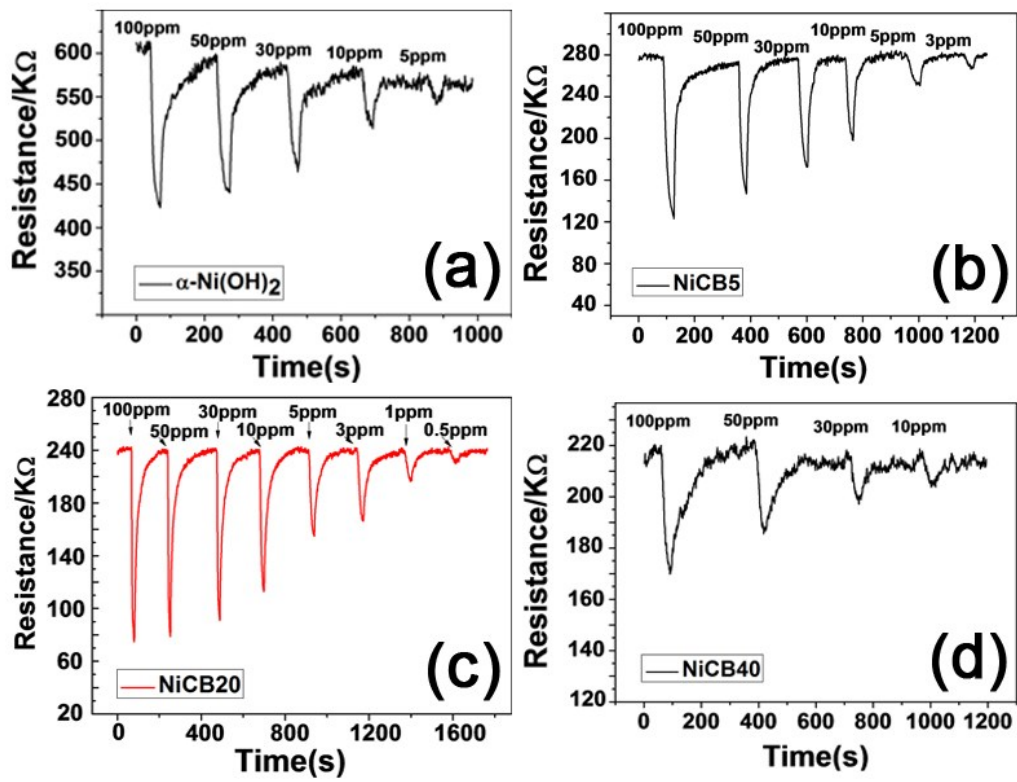

Fig.S5 the resistance transients curve of the sample

Table S2 The response-recovery results of the four samples to NO<sub>2</sub> at room temperature (RT: 22 °C, RH: 26%)

| Concentrations                |                   | 100ppm | 50ppm | 30ppm | 10ppm | 5ppm | 3ppm | 1ppm | 0.5ppm |
|-------------------------------|-------------------|--------|-------|-------|-------|------|------|------|--------|
| $\alpha$ -Ni(OH) <sub>2</sub> | Sensitivity (%)   | 31.1   | 26.4  | 21.5  | 12.1  | 6.4  |      |      |        |
|                               | Response time (s) | 8      | 11.3  | 12.7  | 14    | 15.7 |      |      |        |
| NiCB5                         | Sensitivity (%)   | 55.2   | 49.9  | 41.8  | 32.6  | 12.8 | 6.4  |      |        |
|                               | Response time (s) | 7.3    | 10    | 13.3  | 14    | 15.3 | 18.3 |      |        |
| NiCB20                        | Sensitivity (%)   | 62.5   | 61.2  | 56.6  | 47.5  | 29.1 | 24.1 | 10.2 | 4.7    |
|                               | Response time (s) | 2      | 5     | 5.3   | 10    | 12.7 | 13.3 | 14   | 16.7   |
| NiCB40                        | Sensitivity (%)   | 21.1   | 16.6  | 9.2   | 6.9   |      |      |      |        |
|                               | Response time (s) | 11.3   | 14    | 15.3  | 16.7  |      |      |      |        |

Table.S3 The response data of NiCB20 with single cycle times

| Concentrations | 100ppm            | 10ppm | 1ppm | 0.5ppm |      |
|----------------|-------------------|-------|------|--------|------|
| NiCB20         | Response time (s) | 2.2   | 8.1  | 15.7   | 18.3 |
|                | Response (%)      | 61.8  | 45.3 | 11.5   | 5.8  |

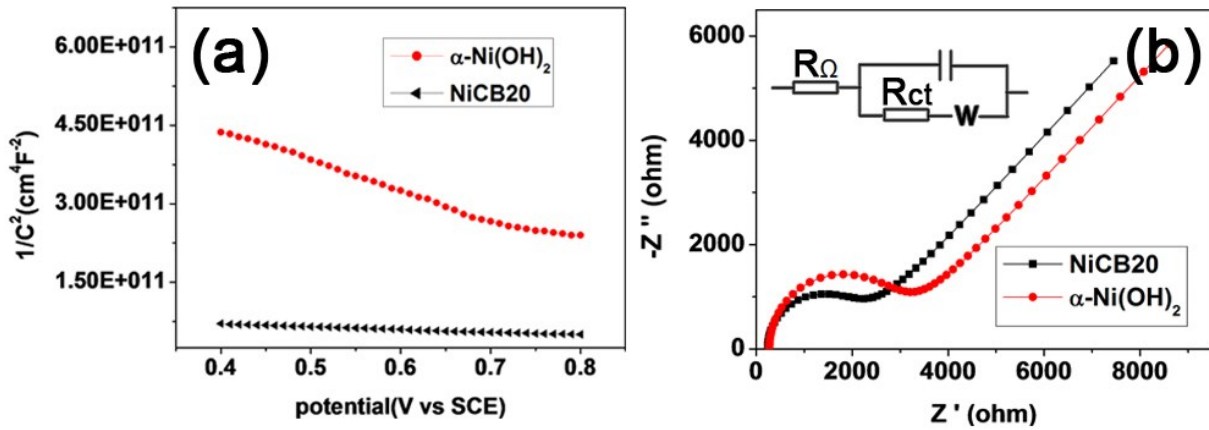

**Fig. S6** (a) The Mott-Schottky curves of  $\alpha$ -Ni(OH)<sub>2</sub> and NiCB20; (b) The EIS curves of  $\alpha$ -Ni(OH)<sub>2</sub> and NiCB20 samples. The left inset is the corresponding equivalent circuit model.

Table S4 The fitted impedance parameters of  $\alpha$ -Ni(OH)<sub>2</sub> and NiCB20 samples

| Samples\ parameters           | $R_{\Omega}$ | C                      | $R_{ct}$ |
|-------------------------------|--------------|------------------------|----------|
| $\alpha$ -Ni(OH) <sub>2</sub> | 579.5        | $5.57 \times 10^{-6}$  | 2740     |
| NiCB20                        | 439.0        | $2.712 \times 10^{-6}$ | 1517     |
